# Supplementary material
Source: PubMed Central journal article supplement (PMC3032078)
Supplement: mmc1.pdf [file mmc1.pdf]

The American Journal of Human Genetics, Volume 86

## Supplemental Data

### Mutations in *HPSE2* Cause Urofacial Syndrome

Sarah B. Daly, Jill E. Urquhart, Emma Hilton, Edward A. McKenzie,  
Richard A. Kammerer, Malcolm Lewis, Bronwyn Kerr, Helen Stuart, Dian Donnai,  
David A. Long, Berk Burgu, Ozgu Aydogdu, Murat Derbent, Sixto Garcia-Minaur,  
Willie Reardon, Blanca Gener, Stavit Shalev, Rupert Smith, Adrian S. Woolf,  
Graeme C. Black, and William G. Newman

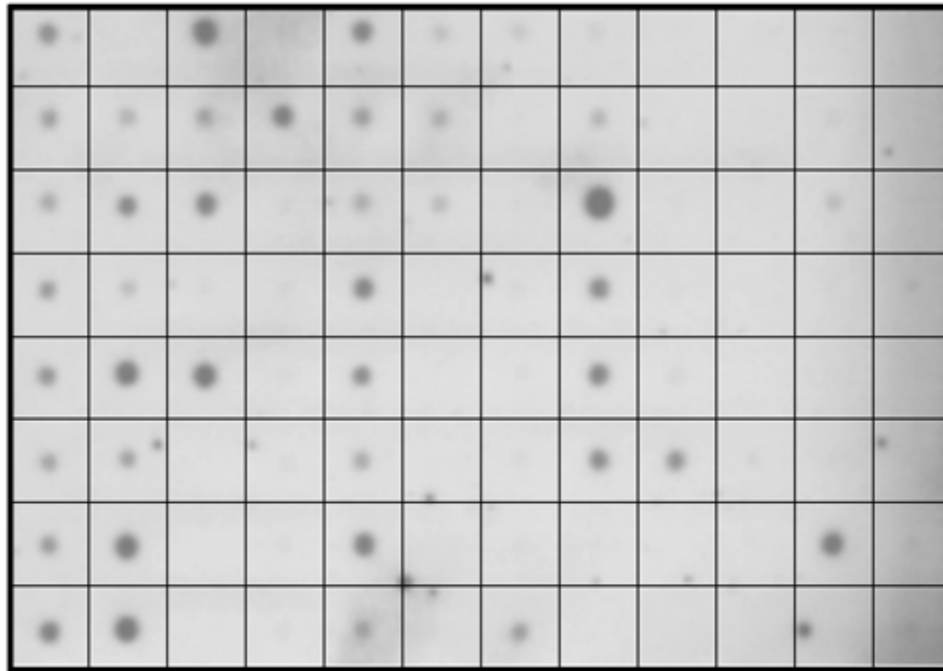

|   | 1                                  | 2                 | 3                 | 4                        | 5                | 6                 | 7                          | 8        | 9              | 10                                | 11           | 12                          |
|---|------------------------------------|-------------------|-------------------|--------------------------|------------------|-------------------|----------------------------|----------|----------------|-----------------------------------|--------------|-----------------------------|
| A | whole brain                        |                   | substantia nigra  | heart                    | esophagus        | colon, transverse | kidney                     | lung     | liver          | leukemia HL-60                    | fetal brain  | yeast total RNA             |
| B | cerebral cortex                    | cerebellum right  | nucleus accumbens | aceta                    | stomach          | colon, descending | skeletal muscle            | placenta | pancreas       | HeLa S3                           | fetal heart  | yeast tRNA                  |
| C | frontal lobe                       | corpus callosum   | thalamus          | atrium, left             | duodenum         | rectum            | spleen                     | bladder  | adrenal gland  | Leukemia K-562                    | fetal kidney | <i>E. Coli</i> rRNA         |
| D | parietal lobe                      | amygdala          | pituitary gland   | atrium, right            | jejunum          |                   | thymus                     | uterus   | thyroid        | Leukemia MOLT-4                   | fetal liver  | <i>E. Coli</i> DNA          |
| E | occipital lobe                     | caudate nucleus   | spinal cord       | ventricle, left          | ileum            |                   | peripheral blood leukocyte | prostate | salivary gland | Burkitt's lymphoma Raji           | fetal spleen | poly r(A)                   |
| F | temporal lobe                      | hippocampus       |                   | ventricle, right         | ileocecum        |                   | lymph node                 | testis   | mammary gland  | Burkitt's lymphoma Daudi          | fetal thymus | human C <sub>β</sub> -1 DNA |
| G | Pa <sup>u</sup> of cerebral cortex | medulla oblongata |                   | inter-ventricular septum | appendix         |                   | bone marrow                | ovary    |                | colorectal adeno carcinoma SW 480 | fetal lung   | human DNA 100ng             |
| H | pons                               | putamen           |                   | apex of the heart        | colon, ascending |                   | trachea                    |          |                | lung carcinoma A549               |              | human DNA 500ng             |

\* Paracentral gyrus

### Figure S1. *HPSE2* RNA Distribution Profiling by Dot Blot Analysis

The human multiple tissue RNA dot-blot indicating expression of *HPSE2* in a number of tissues, notably adult brain, bladder, uterus, prostate and testis.

**Table S1. Sequence of Primers for Amplification of Exon-Intron Boundaries and Break-Point Deletion Boundaries in *HPSE2***

| Fragment                                                | Oligonucleotide                                                   | Size (bp) |
|---------------------------------------------------------|-------------------------------------------------------------------|-----------|
| <b>Primers for PCR and Sequence Analysis</b>            |                                                                   |           |
| <i>HPSE2</i> exon 1                                     | Forward: cactagcgagaccagtagga<br>Reverse: ggcttgagggggttacta      | 394       |
| <i>HPSE2</i> exon 2                                     | Forward: gccctcaggagtaggaaga<br>Reverse: ctccgctccccaataaa        | 293       |
| <i>HPSE2</i> exon 3                                     | Forward: ggagttggagagccttctga<br>Reverse: cagacagatgtgtaccccaaaa  | 399       |
| <i>HPSE2</i> exon 4                                     | Forward: agtgggaagctcatagaaagg<br>Reverse: ttctggccagggtactaga    | 378       |
| <i>HPSE2</i> exon 5                                     | Forward: aaaggcagagagatctgtgga<br>Reverse: gggtgaagccactatggaaa   | 400       |
| <i>HPSE2</i> exon 6                                     | Forward: tcagtttattcctttgatttaggg<br>Reverse: ttttctggaggatgaagga | 243       |
| <i>HPSE2</i> exon 7                                     | Forward: gcaacagagacctgggcta<br>Reverse: tgggactttgtgtcttttcc     | 250       |
| <i>HPSE2</i> exon 8                                     | Forward: cccctgaaaacaggaaatca<br>Reverse: gcagaataatcagcaacacca   | 300       |
| <i>HPSE2</i> exon 9                                     | Forward: ttggtgactggagattggtg<br>Reverse: tggaaacaaggcatgatcaaa   | 295       |
| <i>HPSE2</i> exon 10                                    | Forward: agtgatttctggcccgtgt<br>Reverse: ggtgattccagaggcaaaaa     | 382       |
| <i>HPSE2</i> exon 11                                    | Forward: tagggtctatggtggccaag<br>Reverse: cctactccatcccactgagc    | 400       |
| <i>HPSE2</i> exon 12                                    | Forward: tgcagctgtgtgtgtatcag<br>Reverse: ggctggttctaggatgtct     | 377       |
| <i>HPSE2</i> exon 12b                                   | Forward: ctcaccatgcttctggtt<br>Reverse: gcacagtcaaacacgagttca     | 334       |
| <b>Primers for Exon8-9 Deletion Breakpoint Analysis</b> |                                                                   |           |
| <i>HPSE2</i> 5' exon 8                                  | Forward: cgcccttatcaggtcacat                                      |           |
| <i>HPSE2</i> 3' exon 9                                  | Reverse: gtccggcaaatgtaagcaat                                     |           |

All primers amplified at an annealing temperature of 60°C
